# Supplementary material for: Genome-wide characterization and expression analysis of soybean trihelix gene family
Source: PeerJ journal article supplement (doi:10.7717/peerj.8753), 2020-03-13

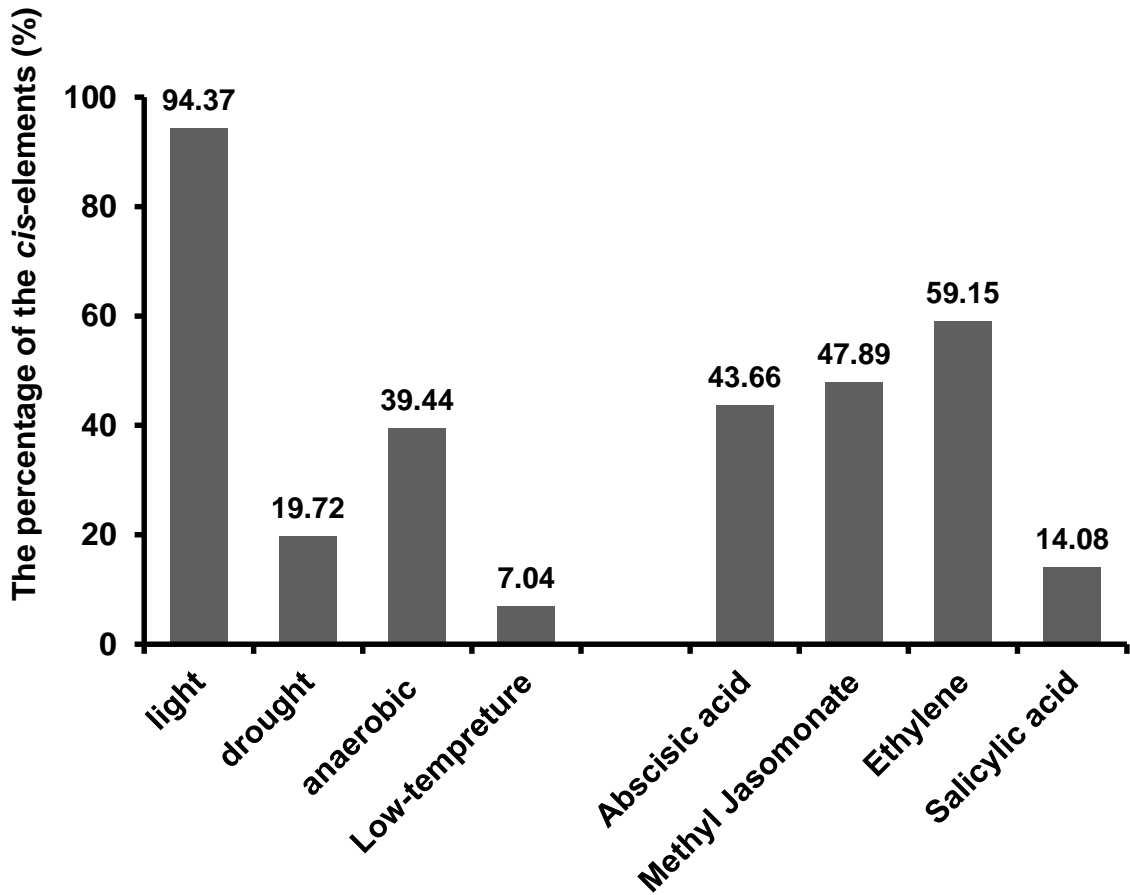

Supplement: Figure_S4.pdf [file Figure_S4.pdf]
