# Supplementary material for: Genome-wide characterization and expression analysis of soybean trihelix gene family
Source: PeerJ journal article supplement (doi:10.7717/peerj.8753), 2020-03-13
Supplement: Figure_S6.pdf [file Figure_S6.pdf]

|                                         |                       | root     | root hairs | nodules  | stem      | SAM      | leaves   | flower   | pod      | seed     |
|-----------------------------------------|-----------------------|----------|------------|----------|-----------|----------|----------|----------|----------|----------|
| <i>Glyma01G121000 vs Glyma03G056900</i> | <i>Glyma01G121000</i> | 0.160619 | 0.248755   | 0.618115 | 0.277469  | 0.023313 | 0.851996 | 0.226749 | 0        | 0        |
|                                         | <i>Glyma03G056900</i> | 0.444181 | 0.610239   | 1.36029  | 1.31391   | 0.075527 | 0.83417  | 2.35939  | 0.217123 | 0.092367 |
| <i>Glyma11G247300 vs Glyma18G010000</i> | <i>Glyma11G247300</i> | 7.87504  | 6.28703    | 8.28761  | 6.324     | 7.51652  | 7.66629  | 10.3313  | 7.98244  | 11.939   |
|                                         | <i>Glyma18G010000</i> | 5.73215  | 4.83253    | 4.37537  | 4.96315   | 7.01261  | 6.12043  | 7.72388  | 5.35083  | 7.20971  |
| <i>Glyma04G216100 vs Glyma09G116400</i> | <i>Glyma04G216100</i> | 2.01793  | 1.34586    | 1.48033  | 1.23753   | 2.30618  | 8.2547   | 4.72849  | 1.95722  | 6.19918  |
|                                         | <i>Glyma09G116400</i> | 1.83779  | 1.39403    | 1.44248  | 2.53842   | 3.84133  | 13.6896  | 3.55846  | 4.84984  | 7.16425  |
| <i>Glyma09G116400 vs Glyma06G149900</i> | <i>Glyma09G116400</i> | 1.83779  | 1.39403    | 1.44248  | 2.53842   | 3.84133  | 13.6896  | 3.55846  | 4.84984  | 7.16425  |
|                                         | <i>Glyma06G149900</i> | 8.90306  | 2.20722    | 2.82885  | 1.81401   | 2.22461  | 5.98026  | 7.89562  | 0.562422 | 1.10702  |
| <i>Glyma10G202300 vs Glyma20G188100</i> | <i>Glyma10G202300</i> | 1.01876  | 0.766811   | 2.38298  | 10.766    | 4.49362  | 0.028172 | 0.293803 | 7.19561  | 0.307679 |
|                                         | <i>Glyma20G188100</i> | 0.741852 | 0.480506   | 1.4559   | 3.01268   | 2.34651  | 0        | 0.039315 | 0.208075 | 0.179956 |
| <i>Glyma19G190000 vs Glyma03G189600</i> | <i>Glyma19G190000</i> | 0.771785 | 2.94245    | 6.20492  | 1.34016   | 2.05404  | 2.97999  | 0.290096 | 0.564081 | 1.7541   |
|                                         | <i>Glyma03G189600</i> | 0.444625 | 15.7617    | 49.7626  | 0.0524641 | 0.026414 | 0.94922  | 0        | 0.367246 | 12.7768  |
| <i>Glyma04G194600 vs Glyma06G171400</i> | <i>Glyma04G194600</i> | 2.83884  | 2.09338    | 1.80004  | 3.06228   | 3.84802  | 7.72941  | 10.6828  | 3.52061  | 3.65722  |
|                                         | <i>Glyma06G171400</i> | 1.84175  | 3.46008    | 1.8496   | 5.87014   | 11.3159  | 14.4378  | 4.88157  | 5.85753  | 2.67731  |
| <i>Glyma10G065100 vs Glyma13G149900</i> | <i>Glyma10G065100</i> | 2.46982  | 3.88209    | 4.03298  | 3.57722   | 3.89898  | 3.68247  | 3.41384  | 3.64869  | 4.30375  |
|                                         | <i>Glyma13G149900</i> | 2.70582  | 4.16189    | 4.89908  | 4.48978   | 4.4701   | 6.43813  | 5.0527   | 5.89147  | 5.41986  |
| <i>Glyma12G210900 vs Glyma13G290500</i> | <i>Glyma12G210900</i> | 2.07574  | 2.24192    | 2.37543  | 1.47902   | 2.01798  | 1.10835  | 1.76709  | 2.43741  | 1.6352   |
|                                         | <i>Glyma13G290500</i> | 1.77946  | 2.1994     | 2.17884  | 2.11521   | 1.43689  | 2.66671  | 2.09713  | 1.90186  | 1.57953  |
| <i>Glyma13G195800 vs Glyma15G234100</i> | <i>Glyma13G195800</i> | 5.67958  | 6.23178    | 8.13482  | 10.6329   | 5.45297  | 3.23444  | 5.60333  | 9.50166  | 3.77473  |
|                                         | <i>Glyma15G234100</i> | 5.83403  | 5.08273    | 12.9437  | 12.2993   | 4.19154  | 1.29944  | 2.67017  | 10.418   | 7.83963  |
| <i>Glyma13G359800 vs Glyma15G014200</i> | <i>Glyma13G359800</i> | 2.75258  | 1.76078    | 3.21281  | 4.18568   | 3.81405  | 4.98121  | 2.2326   | 3.06394  | 3.73436  |
|                                         | <i>Glyma15G014200</i> | 3.15148  | 2.13419    | 3.55901  | 3.77923   | 3.02418  | 3.87305  | 2.81221  | 1.8372   | 2.48522  |
| <i>Glyma10G298700 vs Glyma20G249900</i> | <i>Glyma10G298700</i> | 4.88493  | 12.7034    | 36.3941  | 3.46082   | 3.08699  | 4.30002  | 3.07952  | 3.11447  | 5.73533  |
|                                         | <i>Glyma20G249900</i> | 6.10694  | 6.86154    | 13.3524  | 7.34687   | 3.9675   | 6.42809  | 4.00223  | 5.69598  | 5.87891  |
| <i>Glyma08G257500 vs Glyma18G281800</i> | <i>Glyma08G257500</i> | 3.12346  | 4.41717    | 9.86534  | 4.28739   | 1.91305  | 2.35747  | 2.1459   | 5.72506  | 5.46577  |
|                                         | <i>Glyma18G281800</i> | 1.44784  | 2.57967    | 5.35819  | 1.74489   | 0.885066 | 1.59408  | 0.66809  | 3.36854  | 2.77625  |
