# Supplementary material for: Genome-wide characterization and expression analysis of soybean trihelix gene family
Source: PeerJ. 2020 Mar 13;8:e8753. doi: 10.7717/peerj.8753 (PMC7075366; doi:10.7717/peerj.8753)
Supplement: Table S1 [file peerj-08-8753-s007.xlsx]

## Sheet: Sheet1
	Table S1. Information of trihelix family genes identified in the soybean genome
	Gene locus	Chromosome	Chromosome start	Chromosome end	CDS length	Protein Length	Molecular weight (KDa)	Theoretical pI	Cell location
	Glyma.01G121000	chr01	41469638	41471583	819	272	32.75	7.76	Nuclear
	Glyma.01G150500	chr01	48751166	48753618	927	308	36.08	8.36	Nuclear
	Glyma.02G082000	chr02	7097953	7100899	1800	599	68.01	5.63	Nuclear
	Glyma.02G082100	chr02	7113984	7118481	1896	631	69.99	5.78	Nuclear
	Glyma.03G056900	chr03	7853896	7858329	822	273	32.66	8.94	Nuclear
	Glyma.03G081500	chr03	21975222	21979392	843	280	32.6	4.89	Nuclear
	Glyma.03G189600	chr03	40045932	40048046	1368	455	52.15	6.04	Nuclear
	Glyma.03G191700	chr03	40237382	40240885	1749	582	66.76	6.21	Nuclear
	Glyma.03G246000	chr03	44312958	44316698	1872	623	70.69	6.32	Nuclear
	Glyma.04G135400	chr04	19962935	19966532	1095	364	40.21	9.62	Nuclear
	Glyma.04G194600	chr04	46638765	46649564	2667	888	97.59	8.79	Chloroplast
	Glyma.04G216100	chr04	48744386	48746847	1503	500	56.93	6.25	Nuclear
	Glyma.05G200400	chr05	38413500	38416207	1122	373	42.04	5.41	Nuclear
	Glyma.06G149900	chr06	12238755	12241334	1494	497	56.52	6.51	Nuclear
	Glyma.06G171400	chr06	14344248	14353747	2655	884	97.38	8.14	Chloroplast
	Glyma.07G042800	chr07	3561184	3563334	1107	368	39.86	9.66	Nuclear
	Glyma.07G087900	chr07	8139158	8142797	1083	360	40.97	4.52	Nuclear
	Glyma.07G151100	chr07	18303000	18304681	876	291	35.08	7.05	Nuclear
	Glyma.08G007800	chr08	607655	610045	999	332	37.5	9.27	Nuclear
	Glyma.08G051800	chr08	4026363	4028193	978	325	36.15	9.49	Nuclear
	Glyma.08G257500	chr08	23134462	23138402	981	326	36.14	5.33	Nuclear
	Glyma.09G014300	chr09	1071453	1073566	1017	338	38.56	5.58	Nuclear
	Glyma.09G116400	chr09	27000653	27003076	1473	490	55.82	6.64	Nuclear
	Glyma.09G188900	chr09	41373565	41377066	1194	397	45.61	4.72	Nuclear
	Glyma.09G245300	chr09	46740354	46743540	969	322	36.04	9.63	Nuclear
	Glyma.10G064900	chr10	6204815	6206232	1374	457	52.46	5.95	Nuclear
	Glyma.10G065100	chr10	6219832	6224963	1494	497	54.13	5.82	Nuclear
	Glyma.10G066800	chr10	6494688	6498542	1785	594	68.74	5.96	Nuclear
	Glyma.10G161200	chr10	39537021	39539529	1746	581	67.07	6.32	Nuclear
	Glyma.10G201400	chr10	43259372	43262667	1464	487	52.66	8.49	Chloroplast
	Glyma.10G202300	chr10	43364538	43367507	1629	542	62.31	6.08	Nuclear
	Glyma.10G225100	chr10	45561745	45564354	1452	483	54.71	5.19	Nuclear
	Glyma.10G225200	chr10	45579021	45582548	2004	667	73.47	5.42	Nuclear
	Glyma.10G225300	chr10	45598119	45603561	1335	444	50.75	6.24	Nuclear
	Glyma.10G298700	chr10	51510981	51514774	978	325	36.54	6.41	Nuclear
	Glyma.11G156700	chr11	13755557	13758440	1026	341	38.25	9.31	Nuclear
	Glyma.11G247300	chr11	34012913	34018990	1125	374	42.86	5.59	Nuclear
	Glyma.12G210900	chr12	36990154	36995394	924	307	34.35	9.75	Nuclear
	Glyma.13G149700	chr13	26321941	26324172	1410	469	54.02	6.03	Nuclear
	Glyma.13G149900	chr13	26338007	26343306	1464	487	53.2	5.95	Nuclear
	Glyma.13G195800	chr13	30928265	30932209	981	326	36.58	8.64	Nuclear
	Glyma.13G229600	chr13	34169980	34175488	939	312	35.4	5.06	Nuclear
	Glyma.13G290500	chr13	39067810	39072587	921	306	34.1	10.02	Nuclear
	Glyma.13G340600	chr13	43253874	43256356	1320	439	49.93	5.82	Nuclear
	Glyma.13G359800	chr13	44685993	44687848	1155	384	43.89	4.63	Nuclear
	Glyma.15G014200	chr15	1145159	1147130	1194	397	45.64	4.54	Nuclear
	Glyma.15G033800	chr15	2693820	2696407	1344	447	50.83	5.83	Nuclear
	Glyma.15G082900	chr15	6333075	6334762	753	250	27.69	5.13	Nuclear
	Glyma.15G119000	chr15	9328462	9330770	1017	338	38.59	6.3	Nuclear
	Glyma.15G234100	chr15	44029078	44032076	1005	334	37.13	9.15	Nuclear
	Glyma.16G011200	chr16	975670	977813	1113	370	40.31	9.68	Nuclear
	Glyma.16G093600	chr16	15097779	15098840	801	266	30.96	6.73	Nuclear
	Glyma.16G167500	chr16	32707122	32710495	1851	616	69.48	5.97	Nuclear
	Glyma.16G167600	chr16	32731192	32735019	1968	655	72.7	5.23	Nuclear
	Glyma.16G167700	chr16	32767616	32769786	1332	443	51.47	9.18	Nuclear
	Glyma.17G128500	chr17	10273586	10282732	2613	870	97.03	8.45	Nuclear
	Glyma.17G194700	chr17	29313827	29318631	951	316	35.82	4.85	Nuclear
	Glyma.18G010000	chr18	710647	715894	1131	376	43.07	5.59	Nuclear
	Glyma.18G202400	chr18	48322115	48323896	879	292	34.91	6.89	Nuclear
	Glyma.18G281800	chr18	56277508	56281665	990	329	35.95	5.37	Nuclear
	Glyma.19G190000	chr19	44768793	44770762	1359	452	51.93	6.33	Nuclear
	Glyma.19G192300	chr19	44955552	44959056	1737	578	65.62	6.39	Nuclear
	Glyma.19G243500	chr19	49100319	49103210	1803	600	68.15	6.4	Nuclear
	Glyma.20G166500	chr20	40426391	40428729	1338	445	51.03	6.16	Nuclear
	Glyma.20G166600	chr20	40447535	40451095	1935	644	71.72	5.51	Nuclear
	Glyma.20G166800	chr20	40478860	40482575	1893	630	71.23	5.7	Nuclear
	Glyma.20G184500	chr20	42272420	42275069	996	331	37.53	9.15	Nuclear
	Glyma.20G188100	chr20	42663365	42666259	1614	537	61.23	6.12	Nuclear
	Glyma.20G189000	chr20	42759238	42761897	1200	399	43.21	8.96	Nuclear
	Glyma.20G224000	chr20	45852088	45858726	2016	671	77.04	6	Nuclear
	Glyma.20G249900	chr20	47850624	47854548	960	319	35.82	6.09	Nuclear
