# Supplementary material for: Genome-wide characterization and expression analysis of soybean trihelix gene family
Source: PeerJ. 2020 Mar 13;8:e8753. doi: 10.7717/peerj.8753 (PMC7075366; doi:10.7717/peerj.8753)
Supplement: Table S2 [file peerj-08-8753-s008.xls]

## Sheet: Sheet2
Table S2. The FPKM (Fragments per kilobase for a million reads) value of soybean trihelix genes in different tissues
		Gene ID	root	root hairs	nodules	stem	SAM	leaves	flower	pod	seed
		Glyma.12G210900	2.07574	2.24192	2.37543	1.47902	2.01798	1.10835	1.76709	2.43741	1.6352
		Glyma.13G290500	1.77946	2.1994	2.17884	2.11521	1.43689	2.66671	2.09713	1.90186	1.57953
		Glyma.13G229600	8.46772	8.7771	6.77159	5.97247	5.51393	9.75945	14.7165	5.85764	6.68809
		Glyma.15G082900	4.43707	5.20636	5.45697	6.35486	4.89473	9.22934	7.49862	5.61573	5.39167
		Glyma.07G042800	4.87733	8.33545	6.94928	7.06279	10.935	10.6366	10.0429	8.84928	20.4536
		Glyma.16G011200	4.33867	6.44656	6.91225	7.00069	9.60766	9.58758	14.9241	5.68034	15.9337
		Glyma.07G087900	6.44299	7.07001	6.72467	6.31449	6.45083	8.39625	7.23811	7.81816	7.34477
		Glyma.09G188900	5.92754	6.98388	5.63074	9.18965	7.94133	8.74024	9.24585	8.07762	7.03978
		Glyma.04G135400	0.392887	2.04632	5.44026	10.672	1.14487	2.56772	0.426166	5.06407	5.48715
		Glyma.13G359800	2.75258	1.76078	3.21281	4.18568	3.81405	4.98121	2.2326	3.06394	3.73436
		Glyma.15G014200	3.15148	2.13419	3.55901	3.77923	3.02418	3.87305	2.81221	1.8372	2.48522
		Glyma.11G156700	0.361167	2.0602	3.5894	14.3229	1.49242	2.48819	0.473482	2.53647	2.14027
		Glyma.13G195800	5.67958	6.23178	8.13482	10.6329	5.45297	3.23444	5.60333	9.50166	3.77473
		Glyma.15G234100	5.83403	5.08273	12.9437	12.2993	4.19154	1.29944	2.67017	10.418	7.83963
		Glyma.10G065100	2.46982	3.88209	4.03298	3.57722	3.89898	3.68247	3.41384	3.64869	4.30375
		Glyma.13G149900	2.70582	4.16189	4.89908	4.48978	4.4701	6.43813	5.0527	5.89147	5.41986
		Glyma.10G201400	3.9783	4.91226	4.00715	4.75148	4.74622	6.2473	7.93571	5.43801	4.09519
		Glyma.20G189000	0.799551	1.44447	1.70783	0.994656	1.8359	1.91651	2.30536	2.29049	2.52805
		Glyma.03G081500	4.03612	5.84003	4.25799	5.90761	3.37104	6.35331	2.781	3.93867	4.49425
		Glyma.16G093600	4.65929	5.11788	4.11375	6.61889	4.27177	6.55253	3.19345	5.15478	11.5497
		Glyma.08G051800	4.50864	10.2362	7.08289	10.1421	10.4081	10.6532	10.36	12.1166	9.48698
		Glyma.09G245300	12.571	9.84662	6.26291	8.52566	9.4047	8.34658	7.44429	9.53623	7.98265
		Glyma.17G194700	3.32919	3.98746	3.69653	3.24756	4.87956	3.39171	3.01945	3.47178	5.69272
		Glyma.20G184500	0.141608	0.197922	0.0147603	0.0725438	1.99303	0	0.580703	0.0409792	0.232169
		Glyma.05G200400	0.263539	0.434226	1.53189	0.158946	0.712218	1.69195	0.0429193	0.056279	0.149459
		Glyma.08G007800	0.0309447	0.0277113	0.264747	0	0.0650462	0	0.0100189	0.0353736	0
		Glyma.08G257500	3.12346	4.41717	9.86534	4.28739	1.91305	2.35747	2.1459	5.72506	5.46577
		Glyma.18G281800	1.44784	2.57967	5.35819	1.74489	0.885066	1.59408	0.66809	3.36854	2.77625
		Glyma.10G298700	4.88493	12.7034	36.3941	3.46082	3.08699	4.30002	3.07952	3.11447	5.73533
		Glyma.20G249900	6.10694	6.86154	13.3524	7.34687	3.9675	6.42809	4.00223	5.69598	5.87891
		Glyma.10G225300	12.1286	7.40334	10.8691	5.68796	3.8907	7.69172	13.0541	3.45366	3.50491
		Glyma.20G166500	7.26489	8.28148	11.9169	8.81412	6.49543	13.2521	11.9066	7.03792	4.95279
		Glyma.16G167700	0	0	0	0	0	0	0	0.471732	0.252584
		Glyma.13G340600	1.73606	1.89354	2.47501	3.53869	3.23739	1.91545	1.36599	2.72783	2.50763
		Glyma.15G033800	5.30832	3.80206	3.99861	4.10862	3.05527	3.72267	3.02141	3.63426	3.8556
		Glyma.03G189600	0.444625	15.7617	49.7626	0.0524641	0.0264135	0.94922	0	0.367246	12.7768
		Glyma.13G149700	1.19344	14.5636	39.6913	0.999135	2.25789	6.19647	2.31241	3.84729	19.2835
		Glyma.19G190000	0.771785	2.94245	6.20492	1.34016	2.05404	2.97999	0.290096	0.564081	1.7541
		Glyma.10G064900	0.411208	1.40235	2.51885	1.01146	1.28466	0.826523	0.51067	0.503832	1.8102
		Glyma.01G121000	0.160619	0.248755	0.618115	0.277469	0.0233134	0.851996	0.226749	0	0
		Glyma.03G056900	0.444181	0.610239	1.36029	1.31391	0.075527	0.83417	2.35939	0.217123	0.0923667
		Glyma.07G151100	2.42486	2.05445	2.73486	4.29708	0.35737	0.91302	4.12305	6.33354	0.479322
		Glyma.18G202400	0.716681	0.365428	0.496141	1.20727	0.0672688	1.16697	0.343868	0.435853	0
		Glyma.01G150500	4.86301	3.33158	4.15034	4.1057	2.03118	3.94359	3.93045	2.64158	1.40348
		Glyma.11G247300	7.87504	6.28703	8.28761	6.324	7.51652	7.66629	10.3313	7.98244	11.939
		Glyma.18G010000	5.73215	4.83253	4.37537	4.96315	7.01261	6.12043	7.72388	5.35083	7.20971
		Glyma.17G128500	0.686496	1.74727	2.18149	3.06495	4.50759	12.4955	4.18179	2.74761	3.40433
		Glyma.04G194600	2.83884	2.09338	1.80004	3.06228	3.84802	7.72941	10.6828	3.52061	3.65722
		Glyma.06G171400	1.84175	3.46008	1.8496	5.87014	11.3159	14.4378	4.88157	5.85753	2.67731
		Glyma.03G191700	1.47904	1.5962	2.96069	7.88953	5.34311	0.0767832	0.584505	4.90054	5.03344
		Glyma.19G192300	3.20068	2.44209	2.15527	9.08803	2.35818	0.138987	1.11541	3.96962	2.4739
		Glyma.10G066800	0.528507	0.566676	0.74406	1.69938	3.43267	0.74543	0.970017	2.93217	1.39136
		Glyma.10G202300	1.01876	0.766811	2.38298	10.766	4.49362	0.0281722	0.293803	7.19561	0.307679
		Glyma.20G188100	0.741852	0.480506	1.4559	3.01268	2.34651	0	0.0393154	0.208075	0.179956
		Glyma.03G246000	1.50841	2.43675	1.97757	0.51143	9.87096	0.430875	9.21753	5.35284	8.54994
		Glyma.19G243500	1.77807	6.40567	3.45032	1.88872	14.6252	1.70276	9.10106	13.0031	19.4741
		Glyma.10G161200	2.03993	7.6699	1.49949	8.26959	11.409	7.66725	2.42723	27.1035	28.0021
		Glyma.20G224000	3.71522	6.57669	1.68651	3.95071	7.94721	5.17121	2.13362	11.47	24.0409
		Glyma.09G014300	0.380266	0.464541	1.50055	0.550781	0.908757	0.278	0.172448	0.393873	0.46042
		Glyma.15G119000	0.394578	0.753233	2.78695	0.938615	1.95931	0.478597	0.246774	1.05263	0.849199
		Glyma.04G216100	2.01793	1.34586	1.48033	1.23753	2.30618	8.2547	4.72849	1.95722	6.19918
		Glyma.09G116400	1.83779	1.39403	1.44248	2.53842	3.84133	13.6896	3.55846	4.84984	7.16425
		Glyma.06G149900	8.90306	2.20722	2.82885	1.81401	2.22461	5.98026	7.89562	0.562422	1.10702
		Glyma.02G082000	3.68594	2.20432	0.698961	2.98039	4.08531	15.1384	8.07704	2.37823	2.19946
		Glyma.16G167500	15.0185	2.57005	0.831225	4.12086	5.37313	13.6023	8.11917	1.58327	1.09178
		Glyma.10G225100	56.0555	11.974	16.6899	9.04448	5.8689	9.83271	8.19168	3.26905	6.77143
		Glyma.20G166800	48.1862	13.3118	10.2486	5.062	5.10248	8.48746	7.14601	2.40847	5.0823
		Glyma.02G082100	6.87328	24.9458	6.63739	4.67788	4.66593	4.93315	3.55076	11.6951	3.53882
		Glyma.16G167600	9.81404	15.1358	8.56362	10.3488	13.8343	26.0749	12.2005	7.62777	12.2608
		Glyma.10G225200	9.41181	10.5309	3.7987	4.49677	4.35112	9.66697	3.70905	6.02426	11.3382
		Glyma.20G166600	9.91277	11.3935	4.99078	5.40625	4.20337	11.4046	9.57149	6.01797	9.53697
Note: SAM, Shoot Apical Meristem.
