# Supplementary material for: Genome-wide characterization and expression analysis of soybean trihelix gene family
Source: PeerJ. 2020 Mar 13;8:e8753. doi: 10.7717/peerj.8753 (PMC7075366; doi:10.7717/peerj.8753)
Supplement: Table S3 [file peerj-08-8753-s009.xlsx]

## Sheet: Sheet1
					Table S3. Stress-related elements in the promoters of soybean Trihelix genes
					Cis-element	Gene ID	sequence	location
					MBS	Glyma.01G121000	CAACTG	-1004
						Glyma.02G082000	CAACTG	-681
						Glyma.03G056900	CAACTG	-1012
						Glyma.03G056900	CAACTG	-267
						Glyma.03G081500	CAACTG	-837
						Glyma.03G191700	CAACTG	-697
						Glyma.09G116400	CAACTG	-691
						Glyma.10G065100	CAACTG	-724
						Glyma.10G225300	GCCGAC	-617
						Glyma.10G298700	CAACTG	-793
						Glyma.10G298700	CAACTG	-314
						Glyma.13G340600	CAACTG	-1394
						Glyma.13G340600	CAACTG	-1117
						Glyma.15G033800	CAACTG	-1273
						Glyma.16G011200	CAACTG	-48
						Glyma.16G167500	CAACTG	-688
						Glyma.16G167600	CAACTG	-923
					ARE	Glyma.01G121000	AAACCA	-1073
						Glyma.03G081500	AAACCA	-1439
						Glyma.03G189600	AAACCA	-45
						Glyma.03G189600	AAACCA	-5
						Glyma.04G194600	AAACCA	-254
						Glyma.05G200400	AAACCA	-1358
						Glyma.05G200400	AAACCA	-850
						Glyma.06G149900	AAACCA	-1106
						Glyma.08G257500	AAACCA	-135
						Glyma.09G014300	AAACCA	-1019
						Glyma.09G014300	AAACCA	-707
						Glyma.10G064900	AAACCA	-392
						Glyma.10G064900	AAACCA	-333
						Glyma.10G064900	AAACCA	-302
						Glyma.10G064900	AAACCA	-285
						Glyma.10G065100	AAACCA	-38
						Glyma.10G225100	AAACCA	-419
						Glyma.10G225200	AAACCA	-1377
						Glyma.10G225200	AAACCA	-1119
						Glyma.10G225200	AAACCA	-424
						Glyma.13G149700	AAACCA	-221
						Glyma.13G149900	AAACCA	-1002
						Glyma.13G340600	AAACCA	-1251
						Glyma.13G359800	AAACCA	-177
						Glyma.15G033800	AAACCA	-1130
						Glyma.15G082900	AAACCA	-357
						Glyma.15G082900	AAACCA	-351
						Glyma.15G119000	AAACCA	-1415
						Glyma.15G119000	AAACCA	-870
						Glyma.16G093600	AAACCA	-1314
						Glyma.16G093600	AAACCA	-213
						Glyma.16G167700	AAACCA	-575
						Glyma.17G128500	AAACCA	-958
						Glyma.17G128500	AAACCA	-483
						Glyma.17G194700	AAACCA	-521
						Glyma.18G281800	AAACCA	-988
						Glyma.18G281800	AAACCA	-140
						Glyma.19G190000	AAACCA	-61
						Glyma.19G243500	AAACCA	-1414
						Glyma.20G166600	AAACCA	-1385
						Glyma.20G166600	AAACCA	-1134
						Glyma.20G249900	AAACCA	-1403
						Glyma.20G249900	AAACCA	-1367
						Glyma.20G249900	AAACCA	-1214
						Glyma.20G249900	AAACCA	-116
					LTR	Glyma.04G135400	CCGAAA	-1050
						Glyma.04G194600	CCGAAA	-1118
						Glyma.13G290500	CCGAAA	-152
						Glyma.17G128500	CCGAAA	-1082
						Glyma.20G184500	CCGAAA	-375
					ABRE	Glyma.01G121000	ACGTG	-1476
						Glyma.02G082100	ACGTG	-1393
						Glyma.03G189600	ACGTG	-97
						Glyma.03G191700	ACGTG	-504
						Glyma.03G246000	CACGTG	-753
						Glyma.03G246000	ACGTG	-753
						Glyma.03G246000	ACGTG	-654
						Glyma.03G246000	ACGTG	-53
						Glyma.04G135400	ACGTG	-1412
						Glyma.04G135400	ACGTG	-1359
						Glyma.04G135400	CACGTG	-773
						Glyma.04G135400	ACGTG	-773
						Glyma.04G216100	ACGTG	-1473
						Glyma.04G216100	TACGGTC	-431
						Glyma.04G216100	ACGTG	-73
						Glyma.06G171400	ACGTG	-29
						Glyma.07G151100	CACGTG	-1428
						Glyma.07G151100	ACGTG	-1428
						Glyma.07G151100	CACGTG	-1400
						Glyma.07G151100	ACGTG	-1400
						Glyma.07G151100	TACGGTC	-854
						Glyma.08G007800	ACGTG	-606
						Glyma.08G007800	ACGTG	-553
						Glyma.09G245300	ACGTG	-433
						Glyma.10G161200	CACGTG	-1165
						Glyma.10G161200	ACGTG	-1165
						Glyma.10G161200	ACGTG	-620
						Glyma.10G298700	TACGTGTC	-1059
						Glyma.10G298700	ACGTG	-1061
						Glyma.11G156700	ACGTG	-1391
						Glyma.11G156700	CACGTG	-810
						Glyma.11G156700	ACGTG	-810
						Glyma.11G156700	ACGTG	-580
						Glyma.11G247300	ACGTG	-588
						Glyma.12G210900	ACGTG	-878
						Glyma.12G210900	ACGTG	-178
						Glyma.12G210900	ACGTG	-157
						Glyma.13G149700	CACGTG	-1335
						Glyma.13G149700	ACGTG	-1335
						Glyma.13G149700	CACGTG	-799
						Glyma.13G149700	ACGTG	-799
						Glyma.13G149700	ACGTG	-207
						Glyma.13G195800	ACGTG	-1088
						Glyma.13G195800	ACGTG	-439
						Glyma.15G014200	CACGTG	-1456
						Glyma.15G014200	ACGTG	-1456
						Glyma.15G014200	ACGTG	-574
						Glyma.15G119000	ACGTG	-934
						Glyma.15G234100	ACGTG	-148
						Glyma.16G011200	ACGTG	-386
						Glyma.16G167500	ACGTG	-539
						Glyma.16G167500	ACGTG	-388
						Glyma.17G128500	ACGTG	-338
						Glyma.17G128500	ACGTG	-30
						Glyma.18G010000	ACGTG	-1216
						Glyma.18G010000	GCAACGTGTC	-1190
						Glyma.18G202400	TACGGTC	-896
						Glyma.19G190000	ACGTG	-154
						Glyma.19G192300	ACGTG	-626
						Glyma.19G243500	CACGTG	-756
						Glyma.19G243500	ACGTG	-756
						Glyma.19G243500	ACGTG	-657
						Glyma.19G243500	ACGTG	-57
						Glyma.20G184500	CGCACGTGTC	-24
						Glyma.20G184500	ACGTG	-25
						Glyma.20G189000	GCAACGTGTC	-430
					TGACG-motif	Glyma.01G121000	TGACG	-1103
						Glyma.02G082000	TGACG	-873
						Glyma.03G056900	TGACG	-1114
						Glyma.03G056900	TGACG	-503
						Glyma.03G056900	TGACG	-180
						Glyma.03G191700	TGACG	-300
						Glyma.04G135400	TGACG	-1361
						Glyma.04G135400	TGACG	-909
						Glyma.04G135400	TGACG	-856
						Glyma.04G216100	TGACG	-603
						Glyma.04G216100	TGACG	-75
						Glyma.07G042800	TGACG	-194
						Glyma.07G151100	TGACG	-413
						Glyma.07G151100	TGACG	-402
						Glyma.08G051800	TGACG	-1040
						Glyma.09G014300	TGACG	-1297
						Glyma.09G014300	TGACG	-1210
						Glyma.10G225200	TGACG	-1319
						Glyma.10G225300	TGACG	-880
						Glyma.11G156700	TGACG	-1393
						Glyma.11G156700	TGACG	-948
						Glyma.11G156700	TGACG	-895
						Glyma.11G247300	TGACG	-590
						Glyma.13G149700	TGACG	-1044
						Glyma.13G149900	TGACG	-321
						Glyma.13G195800	TGACG	-1392
						Glyma.13G195800	TGACG	-707
						Glyma.13G195800	TGACG	-473
						Glyma.13G229600	TGACG	-1333
						Glyma.13G290500	TGACG	-697
						Glyma.13G290500	TGACG	-274
						Glyma.13G359800	TGACG	-105
						Glyma.15G014200	TGACG	-68
						Glyma.15G033800	TGACG	-957
						Glyma.15G082900	TGACG	-160
						Glyma.15G119000	TGACG	-975
						Glyma.15G234100	TGACG	-1251
						Glyma.15G234100	TGACG	-182
						Glyma.16G011200	TGACG	-130
						Glyma.17G128500	TGACG	-971
						Glyma.17G128500	TGACG	-944
						Glyma.18G202400	TGACG	-451
						Glyma.18G202400	TGACG	-440
						Glyma.20G166500	TGACG	-1105
						Glyma.20G166500	TGACG	-840
						Glyma.20G166600	TGACG	-1327
						Glyma.20G184500	TGACG	-284
						Glyma.20G189000	TGACG	-204
						Glyma.20G224000	TGACG	-216
						Glyma.20G249900	TGACG	-1481
						Glyma.20G249900	TGACG	-1006
					ERE	Glyma.02G082100	ATTTTAAA	-269
						Glyma.03G056900	ATTTTAAA	-729
						Glyma.03G189600	ATTTTAAA	-1468
						Glyma.04G135400	ATTTTAAA	-267
						Glyma.04G194600	ATTTTAAA	-555
						Glyma.04G194600	ATTTTAAA	-125
						Glyma.06G171400	ATTTCATA	-757
						Glyma.06G171400	ATTTTAAA	-329
						Glyma.07G042800	ATTTTAAA	-68
						Glyma.07G087900	ATTTTAAA	-1395
						Glyma.07G087900	ATTTTAAA	-569
						Glyma.07G151100	ATTTTAAA	-1310
						Glyma.07G151100	ATTTTAAA	-1044
						Glyma.08G051800	ATTTTAAA	-604
						Glyma.08G051800	ATTTCATA	-503
						Glyma.09G014300	ATTTTAAA	-906
						Glyma.09G014300	ATTTTAAA	-698
						Glyma.09G116400	ATTTCATA	-504
						Glyma.09G188900	ATTTCATA	-26
						Glyma.10G064900	ATTTTAAA	-1286
						Glyma.10G064900	ATTTCATA	-1038
						Glyma.10G064900	ATTTTAAA	-847
						Glyma.10G064900	ATTTTAAA	-661
						Glyma.10G064900	ATTTTAAA	-537
						Glyma.10G066800	ATTTTAAA	-906
						Glyma.10G066800	ATTTCATA	-694
						Glyma.10G161200	ATTTTAAA	-458
						Glyma.10G201400	ATTTTAAA	-937
						Glyma.10G202300	ATTTTAAA	-536
						Glyma.11G156700	ATTTTAAA	-363
						Glyma.11G247300	ATTTTAAA	-495
						Glyma.13G149900	ATTTTAAA	-51
						Glyma.13G195800	ATTTCATA	-855
						Glyma.13G195800	ATTTTAAA	-91
						Glyma.13G229600	ATTTTAAA	-1381
						Glyma.13G229600	ATTTTAAA	-569
						Glyma.13G229600	ATTTTAAA	-355
						Glyma.13G359800	ATTTTAAA	-1443
						Glyma.15G014200	ATTTTAAA	-1108
						Glyma.15G014200	ATTTTAAA	-898
						Glyma.15G082900	ATTTTAAA	-1119
						Glyma.15G082900	ATTTTAAA	-1080
						Glyma.15G082900	ATTTTAAA	-594
						Glyma.16G093600	ATTTTAAA	-92
						Glyma.16G167600	ATTTTAAA	-1416
						Glyma.16G167600	ATTTTAAA	-327
						Glyma.17G128500	ATTTTAAA	-1337
						Glyma.17G128500	ATTTTAAA	-1186
						Glyma.17G128500	ATTTTAAA	-486
						Glyma.17G194700	ATTTTAAA	-103
						Glyma.18G010000	ATTTTAAA	-657
						Glyma.18G010000	ATTTCATA	-393
						Glyma.18G281800	ATTTTAAA	-939
						Glyma.19G190000	ATTTTAAA	-319
						Glyma.19G192300	ATTTTAAA	-769
						Glyma.20G166500	ATTTTAAA	-358
						Glyma.20G166600	ATTTTAAA	-885
						Glyma.20G166800	ATTTCATA	-582
						Glyma.20G184500	ATTTCATA	-1253
						Glyma.20G184500	ATTTTAAA	-324
						Glyma.20G188100	ATTTTAAA	-509
						Glyma.20G189000	ATTTTAAA	-496
						Glyma.20G224000	ATTTTAAA	-1408
						Glyma.20G224000	ATTTTAAA	-1391
						Glyma.20G249900	ATTTTAAA	-1370
					TCA-element	Glyma.01G121000	TCAGAAGAGG	-761
						Glyma.01G121000	CCATCTTTTT	-132
						Glyma.03G056900	CCATCTTTTT	-176
						Glyma.13G290500	CCATCTTTTT	-1447
						Glyma.13G340600	TCAGAAGAGG	-307
						Glyma.15G234100	CCATCTTTTT	-1379
						Glyma.17G128500	CCATCTTTTT	-1121
						Glyma.17G128500	TCAGAAGAGG	-937
						Glyma.17G128500	CCATCTTTTT	-262
						Glyma.19G190000	CCATCTTTTT	-693
						Glyma.19G190000	TCAGAAGAGG	-225
						Glyma.20G188100	CCATCTTTTT	-258
						Glyma.20G224000	TCAGAAGAGG	-1270
						Glyma.20G249900	CCATCTTTTT	-764
					Note: A 1.5 kb length upstream of translation initiation codon ATG were extracted and used for Plantcare analysis. The translated start site is defined as +1. ABRE: abscisic acid responsive element; ARE: anaerobic responsive element; DRE: drought responsive element; ERE: ethylene responsive element; LTR: low temperature responsive element; MBS: drought responsive element; TCA-element: salicylic a…
