# Supplementary material for: Genome-wide characterization and expression analysis of soybean trihelix gene family
Source: PeerJ. 2020 Mar 13;8:e8753. doi: 10.7717/peerj.8753 (PMC7075366; doi:10.7717/peerj.8753)
Supplement: Table S4 [file peerj-08-8753-s010.xlsx]

## Sheet: Sheet1
Table S4. putative MAPK phosphorylation sites of soybean trihelix genes
		Sub-family	Gene ID	Position	Amino Acid	Sequence	Score	Specificity
		GT-1	Glyma.01G150500	33	S	LLNPASVMSGEMSPAVPAAREERGP	1.17	0.9822
		GT-2	Glyma.02G082100	177	T	PSKPPQTTALLATPVSIVVTTTTTP	1.27	0.9928
				215	T	NTPPLPQAILNITPPSTLNITTPSF	1.37	0.9968
				254	T	NPTTNNNPPNTITPASFPNFSADLL	1.16	0.9821
			Glyma.03G246000	387	T	NDPSNEDNNLEPTPSPKMIQNHDQA	1.22	0.9883
			Glyma.04G216100	10	T	***MLEISTSQETPLENADGGSAAV	1.19	0.9854
			Glyma.10G225100	193	T	ITLPPPTRPSAITPISYVTTTVPST	1.28	0.9929
			Glyma.10G225200	204	T	IATTTTVSLPIPTPTTVPMQPILSN	1.2	0.9859
				233	T	TSSVPNITVPSTTPLPITIPQPILT	1.23	0.9895
				246	S	PLPITIPQPILTSPSINLTIPSYPP	1.22	0.9881
			Glyma.16G167500	26	S	HTQPEMAVTAVVSPPEEVAHDGSDN	1.32	0.995
			Glyma.16G167600	175	T	PKPPPQTTALSATPVSIVVTTTTTT	1.27	0.9927
				225	T	TSLPMPQSILNITPPSTLNITIPSF	1.3	0.9939
				266	T	TSNNNNNPPSTITPPSFPNFPADLL	1.21	0.987
			Glyma.19G243500	376	T	NNPSNEDNNLEPTPSSKMIQNHGQT	1.22	0.9886
			Glyma.20G166600	231	T	ILPITIPQPILTTPSINLTIPSYPP	1.22	0.9881
				400	T	QLQPQPPVQQQVTPPNIVPAPMQQP	1.21	0.9872
		SIP1	Glyma.07G042800	21	S	SHPSPASGSPPSSPRANGRITVTVA	1.24	0.99
				239	S	PVESDSEERDASSPASSDSFPPESF	1.23	0.99
			Glyma.07G087900	252	S	LNSSNGFDEMRDSPGESESDDDDDE	1.33	0.9959
			Glyma.09G188900	289	S	LNSSNGFDEMRDSPGESESDDDDEE	1.33	0.9954
			Glyma.10G201400	11	S	**MATEDYPLLDSPSHGQPHLHAST	1.22	0.9889
				216	S	DDKAGSSGGGANSPSMARQTKNRYA	1.24	0.99
			Glyma.11G156700	152	S	LLRGTAPISSSLSPPPIAAARPIIA	1.36	0.9966
			Glyma.12G210900	146	T	PPPSSAGVTRRSTPPAKSPLWPVIP	1.19	0.9851
				178	S	KKRPAQAKPASASPDSVADSYFRRN	1.19	0.9849
			Glyma.13G195800	161	S	GPLMVAAPMPPLSPVEPSQPLAPSG	1.2	0.9859
				217	T	VSSKNPLDTDSSTPALYSQKEELRS	1.23	0.9892
			Glyma.13G229600	12	T	*MPDFHDSLLTTTPPPSRPVPVRED	1.24	0.9908
				134	S	FSAKKSTSSPSPSPPVALPLLPHRK	1.24	0.9905
			Glyma.13G290500	144	T	SPPATAGITRRSTPPAKSPPWAVIP	1.26	0.9915
				149	S	AGITRRSTPPAKSPPWAVIPVGPRS	1.24	0.99
				176	S	KKRPAAAKPASASPDSVANSYFRRN	1.2	0.9861
			Glyma.13G359800	280	S	LNHANGLDEMRDSPDNTESTGEEGS	1.24	0.9904
			Glyma.15G014200	25	S	NPYGYGYQNSPYSPPVDTEYAHDDN	1.24	0.9905
			Glyma.15G082900	135	S	FSAKKSTSPPSPSPPVALPLLPHRK	1.23	0.9899
			Glyma.15G234100	163	S	PPAMMPAAMPVLSPVEPSQPPQLSP	1.22	0.9889
			Glyma.16G011200	21	S	SHPSPASGSPPSSPRSNGRITVTVA	1.22	0.9887
				241	S	PVDSDSEERDASSPASSDSFPPESF	1.24	0.99
		GTγ	Glyma.10G064900	10	S	***MFSGLVGVESPLQQQQQEQNPH	1.24	0.9903
		SH4	Glyma.10G298700	155	S	SPAALALALSSSSPPPPTTTKTITL	1.19	0.9854
			Glyma.18G281800	244	T	GNPQGTTNGKRATPNPEMGSTSQGE	1.21	0.9878
			Glyma.20G184500	192	S	HQQPLAIPLVTSSPSPLQTLPPPPL	1.46	0.999
				194	S	QPLAIPLVTSSPSPLQTLPPPPLPP	1.25	0.9914
				221	T	PPPPPPPPVSSTTPVGSERSESSGT	1.39	0.9977
		GTδ	Glyma.17G128500	33	S	HPTRRSLASCSLSPSSLPDTDGPKV	1.22	0.9884
