# Supplementary material for: Genome-wide characterization and expression analysis of soybean trihelix gene family
Source: PeerJ. 2020 Mar 13;8:e8753. doi: 10.7717/peerj.8753 (PMC7075366; doi:10.7717/peerj.8753)
Supplement: Table S5 [file peerj-08-8753-s011.xls]

## Sheet: psRNATargetJob-1570526658966342
			Table S5. List of soybean trihelix genes with putative miRNA target sites
		Gene ID	Predicted miRNA	Expectation	UPE	miRNA_start	miRNA_end	Target_start	Target_end	miRNA_aligned_fragment	alignment	Target_aligned_fragment	Inhibition
		Glyma.16G011200	gma-miR1533	1.5	14.672	1	19	1535	1553	AUAAUAAAAAUAAUAAUGA	:.::::::::: :::::::	UUAUUAUUAUUAUUAUUAU	Cleavage
		Glyma.07G042800	gma-miR1533	1.5	16.226	1	19	1661	1679	AUAAUAAAAAUAAUAAUGA	:.::::::::: :::::::	UUAUUAUUAUUAUUAUUAU	Cleavage
		Glyma.09G116400	gma-miR1533	3	12.705	1	19	24	42	AUAAUAAAAAUAAUAAUGA	:.::::::::: : :::::	UUAUUAUUAUUAUCAUUAU	Cleavage
		Glyma.13G149900	gma-miR1512a-3p	2.5	12.211	1	21	1844	1864	GCUUUAAGAAUUUCAGUUAUG	:::.:::::.::::::.:::	CAUGACUGAGAUUCUUGAAGA	Cleavage
		Glyma.10G065100	gma-miR1512a-3p	2.5	10.945	1	21	1853	1873	GCUUUAAGAAUUUCAGUUAUG	:::.:::::.::::::.:::	CAUGACUGAGAUUCUUGAAGA	Cleavage
		Glyma.03G189600	gma-miR1512a-3p	3	13.413	1	21	1870	1890	GCUUUAAGAAUUUCAGUUAUG	:::.:::::::.: :.:::	GUUAAUUGAAAUUUUAAGAGC	Cleavage
		Glyma.11G247300	gma-miR1520o	2.5	11.092	1	24	1091	1114	UCAUCGUCCAAUCAGAAUGUGACA	.:::::.::.::::: :::::	ACGUACAUUUUGGUUGGAGGAUGA	Cleavage
			gma-miR396f	3	19.727	1	25	614	638	AGCUUUCUUGAACUUCUUAUGCCUA	:::.::::::::::.::	CCUCUUGAAGGAGUUCAAGAAGGCC	Cleavage
			gma-miR5379	2.5	10.342	1	24	1629	1652	AUGAAAAUCAUUCAUUAUGAUAUC	:: :.:::.::.:: ::::::::	AAUUUUAUAGUGGAUCAUUUUCAU	Translation
		Glyma.18G010000	gma-miR1520o	2.5	12.75	1	24	1080	1103	UCAUCGUCCAAUCAGAAUGUGACA	.:::::.::.::::: :::::	ACGUACAUUUUGGUUGGAGGAUGA	Cleavage
			gma-miR396f	3	21.28	1	25	603	627	AGCUUUCUUGAACUUCUUAUGCCUA	:::.::::::::::.::	UCUCUUGAAGGAGUUCAAGAAGGCC	Cleavage
		Glyma.07G151100	gma-miR1520p	3	3.458	1	24	232	254	AUGUUGUUAUUGGAUGAUGACGGU	: : :::::::: :: ::::::::	AACAUCAUCAUC-AACAACAACAU	Translation
			gma-miR5037a	2.5	14.438	1	22	843	865	GCCUCAAAGGCUUCCA-CUACUG	::::.: ::::::::::::::::	CAGUGGAUGGAAGCCUUUGAGGC	Cleavage
		Glyma.17G128500	gma-miR1521a	3	16.881	1	20	3006	3025	CUGUUAAUGGAAAAUGUUGA	:..::::::: ::::::::	UUGACAUUUUACAUUAACAC	Translation
			gma-miR156b	3	9.971	1	21	189	209	UGACAGAAGAGAGAGAGCACA	::: ::::::::::: :.:	GUUGCACUCUCUCUUCUCUUA	Cleavage
			gma-miR156f	3	9.911	1	22	189	210	UUGACAGAAGAGAGAGAGCACA	::: ::::::::::: :.::	GUUGCACUCUCUCUUCUCUUAA	Cleavage
		Glyma.12G210900	gma-miR1522	3	10.254	1	20	1207	1226	UUUAUUGCUUAAAAUGAAAU	::::::: :. :::.::::	CUUUCAUUAUGUGCAGUAAA	Translation
		Glyma.20G224000	gma-miR1526	3	14.414	1	22	2381	2402	CCGGAAGAGGAAAAUUAAGCAA	:: .::::::::. :.:::.::	UUUUUUAAUUUUUGUUUUCUGG	Translation
		Glyma.02G082100	gma-miR1529	3	8.46	1	23	2689	2711	UUAAAGGAAACAAUUAAUCGUUA	.:::::: ::::.:::::	AAUUUGUUAAUUUUUUCUUUUAA	Translation
			gma-miR5369	3	5.462	1	19	2586	2604	UGAGAAAAGGAGGAUGUCA	::: :..:::::::::::	UGAAUUUUUCCUUUUCUCA	Cleavage
		Glyma.01G150500	gma-miR167h	3	18.099	1	24	1369	1392	AUCAUGCUGGCAGCUUCAACUGGU	:: ::::::.: :.:::::	UGGUAUUUAAGCUGUCUGUAUGAU	Cleavage
		Glyma.11G156700	gma-miR171c-5p	3	12.976	1	21	651	671	AGAUAUUGGUGCGGUUCAAUC	:.::::::::.::::::	CGCGGGACCGCACCGAUAUCU	Cleavage
		Glyma.19G243500	gma-miR4348b	3	14.429	1	21	921	941	UCUUUUGAAUUUGACUAUUAG	:. :::::::::::::.:	GGAGAAGUCAAAUUCAAAGGU	Cleavage
			gma-miR5041-5p	3	14.307	1	21	668	688	UUUCAUCUUCAACUUGCUCAA	::: :. ::::::::::.:	AGGAGAAGUUUGAAGAUGAGA	Cleavage
			gma-miR5376	3	10.686	1	22	1262	1283	UGAAGAUUUGAAGAAUUUGGGA	:: ::::: :::::::::::	UCACAAAUGAUUCAAAUCUUCC	Cleavage
		Glyma.17G194700	gma-miR4396	3	18.325	1	24	1021	1044	UGUAGUUUCUAAGACGAUGCUGAC	: :::.:::: ::::::.::	GGAAACAUUGUCUCUGAAACUGCA	Translation
		Glyma.18G202400	gma-miR5037a	2.5	14.37	1	22	810	832	GCCUCAAAGGCUUCCA-CUACUG	::::.: ::::::::::::::::	CAGUGGAUGGAAGCCUUUGAGGC	Cleavage
		Glyma.03G246000	gma-miR5376	3	12.811	1	22	1308	1329	UGAAGAUUUGAAGAAUUUGGGA	::::: :::::::::::	AAACAAAUGGUUCAAAUCUUCC	Cleavage
		Glyma.20G166800	gma-miR5671b	3	13.268	1	22	312	333	UACCCGAAUUUGCUUCCAUGAU	:: ::::: :::::::: :::.	AUGAUGGAUGCAAAUUCCGGUG	Cleavage
		Glyma.20G166600	gma-miR9722	3	6.24	1	21	2589	2609	UAAUAGAGGGAAGAAGAUGAA	::.: :::::::..:.:::::	UUUAGCUUCUUCUUUUUAUUA	Cleavage
		Glyma.10G225300	gma-miR9729	3	20.872	1	24	4756	4779	GUAAUGAGUAGAAACAUUUAGAAG	: :::: ::.:.::::::::	AGGAUCAAUGCUUUUGCUCAUUAC	Cleavage
			gma-miR9750	3	14.839	1	22	572	593	UGUAAGUCCAUAUGUGCUCUCU	:::::.: ::::..::.::	AUUGAGCAUAAAUGGGUUUGCA	Cleavage
		Glyma.15G119000	gma-miR9736	3	4.169	1	21	186	206	UGAAAGACAAACAAAGGUGGG	::.:.::: ::: :::::::	GCCGCUUUUUUUUCUCUUUCA	Cleavage
		Glyma.15G234100	gma-miR9737	2.5	10.854	1	22	383	404	UUGUGGCUGAAAUCACUGUUGC	::. :::::::::::::::	AAAAUCUUGAUUUCAGCCACAA	Cleavage
		Glyma.13G195800	gma-miR9737	2.5	15.686	1	22	77	98	UUGUGGCUGAAAUCACUGUUGC	:. :::.:::.::::::::	AUUAUUGUGGUUUUAGCCACAA	Cleavage
		Glyma.19G192300	gma-miR9748	2.5	2.66	1	22	340	361	GAAGGAAGUGUAGAGGGAUGAC	::::..:::: :::::.::::	UUCAUUUCUCUCCACUUUCUUC	Translation
		Note: UPE, energy to unpair target site

## Sheet: Sheet1
			Glyma.16G011200
