# Supplementary material for: Genome-wide characterization and expression analysis of soybean trihelix gene family
Source: PeerJ. 2020 Mar 13;8:e8753. doi: 10.7717/peerj.8753 (PMC7075366; doi:10.7717/peerj.8753)
Supplement: Table S6 [file peerj-08-8753-s012.xlsx]

## Sheet: Sheet1
Table S6. The FPKM value of the 71 trihelix genes 3 hours, 6 hours, 12 hours and 24 hours after submergence treatment.
Gene ID	CK3h_1_FPKM	CK3h_2_FPKM	CK3h_3_FPKM	CK6h_1_FPKM	CK6h_2_FPKM	CK6h_3_FPKM	CK12h_1_FPKM	CK12h_2_FPKM	CK12h_3_FPKM	CK24h_1_FPKM	CK24h_2_FPKM	CK24h_3_FPKM	F3h_1_FPKM	F3h_2_FPKM	F3h_3_FPKM	F6h_1_FPKM	F6h_2_FPKM	F6h_3_FPKM	F12h_1_FPKM	F12h_2_FPKM	F12h_3_FPKM	F24h_1_FPKM	F24h_2_FPKM	F24h_3_FPKM
Glyma.01G121000	0.12	0.56	0.54	0.14	0.35	0.26	1.22	0.99	0.46	0.38	0.34	0.19	0.47	1.82	0.79	0.36	1	0.52	0.63	0.82	0.78	0.21	0.31	0.34
Glyma.01G150500	6.12	7.35	7.82	7.66	7.63	7.4	8.16	9.03	7.38	7.61	7.57	6.99	9.08	13.39	13.01	7.86	8.31	10.07	12.95	13.04	10.45	10.31	11.64	11.78
Glyma.02G082000	1.8	2.22	1.76	2.6	1.4	2.88	1.21	2.2	2.12	3.08	2.09	1.92	2.6	2.18	2.63	3.06	2.62	2.79	1.83	1.63	2.3	2.3	2.6	3.08
Glyma.02G082100	10.08	10.66	4.78	11.37	8.54	10.93	5.6	5.76	12.78	11.65	6.68	10.72	10.48	11.79	11.45	16.17	15.64	17.76	16.48	16.81	12.75	16.06	11.87	15.72
Glyma.03G056900	0.69	0.7	0.56	0.3	0.68	0.46	1.07	0.84	0.97	0.42	0.74	0.47	0.56	1.74	0.63	0.4	0.77	0.64	1.49	1.02	0.78	0.42	1.35	0.36
Glyma.03G081500	11.29	10.15	8.94	11.63	11.14	11.49	10.46	10.79	13.99	10.92	10.36	11.43	10.67	9.79	11.5	15.14	10.97	13.14	8.05	12.45	12.01	8.35	9.79	9.43
Glyma.03G189600	0.25	0.2	0.42	0.81	4.9	1.44	0.42	0.72	0.48	0.09	0.11	0.48	346.85	235.36	199.97	468.88	341.89	353.51	259.81	291.81	272.14	284.09	262.42	287.54
Glyma.03G191700	2.22	0.45	3.03	1.22	2.75	1.31	4.42	3.17	2.73	1.24	3.93	1.15	1.81	1.69	1.74	1.05	3.34	1.22	0.69	0.92	3.41	0.33	1.35	1.73
Glyma.03G246000	0.72	1.32	0.46	1.17	1.35	1.01	0.47	0.53	1.45	1.04	0.47	1.22	1.96	1.82	2.74	0.5	1	0.98	0.58	0.2	0.62	0.26	0.32	0.88
Glyma.04G135400	6.56	2.81	7.63	3.87	4.52	5.08	6.43	7.47	5.95	3.22	7.55	3.28	1.98	1.66	1.03	1.07	4.68	1.49	0.66	1.01	2.26	0.93	1.71	1.6
Glyma.04G194600	1.46	1.46	1.41	1.87	1.52	1.65	1.61	1.51	2.07	1.55	1.43	1.56	1.92	1.91	1.91	1.12	0.96	1.28	0.96	0.95	0.66	0.82	0.89	1.18
Glyma.04G216100	3.09	2.44	3.5	2.19	2.14	2.13	3.87	2.91	3.92	3.85	3.09	3.35	8.96	12.76	12.3	5.52	8.35	6.28	3.15	6.86	6.99	1.5	2.36	3.89
Glyma.05G200400	1.48	0.83	1.65	1.29	7.95	1.44	4.55	1.81	2.91	1.17	3.37	1.92	0.33	0.4	0.18	0.06	0.03	0	0.03	0	0.03	0	0.03	0.03
Glyma.06G149900	3.62	3.61	2.85	3.28	3.2	3.27	4.95	4.7	3.56	4.88	3.15	4.47	16.37	22.03	20.07	17.3	20.41	18.33	20.31	15.72	13.95	14.42	13.46	14.85
Glyma.06G171400	1.19	1.25	0.77	1.09	1.47	1.36	1.54	1.14	2.27	0.87	0.87	0.91	0.43	0.37	0.41	0.16	0.22	0.14	0.07	0.02	0.03	0.01	0.03	0.08
Glyma.07G042800	19.25	18.25	20.33	18.22	17.93	18.57	19.57	20.21	14.12	23.29	24.44	19.42	39.62	36.89	45.37	42.86	43.94	40.56	54.25	58.95	52.5	34.9	42.92	36.74
Glyma.07G087900	16.78	17.12	15.72	19.27	18.68	17.71	12.01	12.71	10.11	17.02	18.05	16.9	8.86	9.72	12.26	8.8	10.79	10.28	9.93	11.63	10.13	14.23	14.88	13.4
Glyma.07G151100	3.2	1.97	2.8	2.37	2.99	2.38	5.55	3.3	3.14	2.57	2.65	2.89	2.64	4.61	3.48	3.48	4.9	3.2	9.82	8.04	5.83	7.28	8.13	5.54
Glyma.08G007800	0.98	0.92	0.85	1.05	2.5	0.37	2.04	1.14	2.14	0.54	1.11	0.84	0.22	0.19	0	0.2	0.04	0.04	0.05	0	0.06	0	0.16	0.04
Glyma.08G051800	46.98	47.07	47.67	40.96	43.55	39.29	40.96	39.1	42.04	45.05	50.97	46.51	22.62	20.73	23.58	22.82	23.72	22.55	23.26	24.98	21.3	19.49	22.43	24.92
Glyma.08G257500	7.39	6.18	7.45	7.26	9.34	6.88	7.14	9.08	7.29	6.34	8.42	6.27	7.24	7.19	7.99	6.17	6.83	6.7	6.19	6.91	5.95	5.8	6.68	7.85
Glyma.09G014300	1.81	0.55	1.23	1.11	2.37	0.89	1.03	1.17	1.57	0.53	1.57	0.89	0.96	0.39	0.68	0.26	0.34	0.3	0.28	0.06	0.28	0.07	0.14	0.13
Glyma.09G116400	2.37	2.48	1.75	2.29	2.47	2.81	2.1	3.82	2.23	3.21	2.26	2.57	21.23	22.74	27.66	21.09	30.68	25.72	22.17	27.04	22.82	16.72	14.29	16.24
Glyma.09G188900	12.62	16.1	14.23	16.01	16.31	17.12	14.49	13.4	13.01	13.16	13.23	14.42	5.65	5.9	6.18	6.19	7.43	8.02	7.97	7.28	5.97	7.73	8.24	8.93
Glyma.09G245300	39.12	40.17	39.09	41.51	43.98	38.69	27.45	30.77	26.45	45.56	44.66	42.5	21.11	18.97	26.13	27.01	28.91	29.74	20.37	31.42	23.04	23.88	31.62	32.1
Glyma.10G064900	1.6	1.46	1.41	1.17	2.11	1.8	2.34	1.6	1.45	1.38	2.11	1.55	73.1	48.56	70.4	64.04	43.28	40.21	29.35	41.63	31.37	23.87	29.01	23.9
Glyma.10G065100	7.66	6.62	8.48	8.4	7.78	7.51	4.52	4.17	4.39	8.4	9.14	8.76	7.94	8.25	8.06	8.31	7.97	8.8	5.23	4.62	5.16	7.37	7.77	7.69
Glyma.10G066800	0.11	0.02	0.02	0	0.29	0.11	0.34	0.11	0.32	0.09	0.27	0.11	0.02	0	0.02	0.02	0.07	0	0	0	0.02	0	0	0
Glyma.10G161200	1.23	1.09	2.16	1.63	1.02	1.04	1.38	0.81	2.34	0.92	0.65	1.38	0.35	0.33	0.26	0.55	1.1	0.63	0.19	0.85	1.12	0.32	0.69	0.53
Glyma.10G201400	10.1	9.01	10.09	9.82	11.21	9.3	7.98	8.8	7.69	10.04	11.07	10.73	9.89	8.28	9.18	9.74	9.22	10.34	9.89	10.27	8.83	14.22	14.79	12.72
Glyma.10G202300	1.67	0.38	2.55	1.51	3.49	1.19	3.39	2.11	3.7	0.84	4.28	1.13	0.6	0.39	0.58	0.32	0.9	0.23	0.02	0.29	0.37	0.02	0.29	0.18
Glyma.10G225100	55.35	50.47	47.71	54.39	43.58	55.67	59.7	87.77	78.29	53.43	40.03	49.71	37.88	40.64	43.18	52.51	50.29	65.62	76.12	99.04	71.26	48.71	57.02	50.47
Glyma.10G225200	11.72	13.52	10.42	13.26	12.23	12.99	12.46	9.87	13.15	12.51	11.15	12.2	10.2	12.65	12.19	10.5	11.61	14.33	9.3	18.63	8.42	8.56	10.97	12.01
Glyma.10G225300	5.57	7.13	6.6	6.84	6.04	7.35	6.31	8.83	6	7.06	6.1	6.52	2.88	3.87	6.37	3.75	5.81	5.26	3.55	7.27	6.25	2.54	4.69	4.24
Glyma.10G298700	13.99	9.34	13.17	11.76	18.2	13.32	14.35	12.72	11.26	13.16	16.56	12.27	10.81	11.04	11.69	16.86	12.8	15.16	12.98	17.26	14.5	13.75	12.31	12.14
Glyma.11G156700	13.15	8.02	10.39	10.13	11.24	10.98	10.75	18.05	7.32	11.16	12.75	7.89	1.67	2.12	1.53	2.58	4.58	2.38	1.71	2.48	3.26	2.15	3.17	2.48
Glyma.11G247300	15.73	12.56	13.33	12.2	13.55	12.89	14.37	13.58	11.29	13.63	14.08	14.64	29.07	26.33	23.91	33.05	25.15	30.11	25.33	24.23	22.15	24.5	23.17	20.72
Glyma.12G210900	9.16	9.45	8.31	10.8	9.75	9.33	6.72	7.44	8.23	8.06	7.19	9.47	3.44	3.82	3.58	3.7	4.7	4.94	3.52	2.9	3.94	4.86	4.91	6.65
Glyma.13G149700	1.33	1.4	1.49	2.06	6.52	3.28	4.55	2.9	3	1.71	2.18	1.87	274.65	196.44	248.43	337.98	246.79	254.21	252.49	313.33	285.66	234.31	240.9	224.24
Glyma.13G149900	7.01	6.95	7.86	7.42	8.64	8.68	4.93	5.23	3.78	9.56	8.71	8.34	7.94	7.98	9.05	8.41	10.06	9.38	5.91	6.18	7.44	8.81	10.06	8.91
Glyma.13G195800	16.21	19.43	20.93	16.98	16.08	19.83	19.88	40.14	13.86	13.2	18.98	13.59	6.15	7.35	9.33	5.37	7.54	6.5	2.31	5.57	6.71	1.26	2.94	2.81
Glyma.13G229600	21.82	23.25	24.19	21.05	23.29	20.53	26.53	27.09	24.39	23.44	23.67	24.81	45.16	50.79	60.48	40.06	35.65	42.52	51.53	50.69	34.96	27.99	33.56	31.38
Glyma.13G290500	7.42	8.53	6.53	8.4	6.96	7.51	5.82	6.2	6.73	7.87	7.07	7.87	6.54	6.46	6.36	7.6	8.1	6.72	7.4	4.63	5.37	10.18	7.9	9.92
Glyma.13G340600	3.93	2.69	3.31	3	3.35	3.23	2.72	2.56	2.66	3.22	3.11	2.71	2.02	1.84	2.11	1.63	2.54	2.31	1.65	1.89	2.5	1.36	1.97	2.08
Glyma.13G359800	3.57	3.28	3.19	3.17	3.46	2.5	3.2	3.62	3.12	3.21	3.63	3.42	2.46	2.2	2.93	2.57	2.99	3.44	2.58	3.63	2.86	2.79	2.52	2.92
Glyma.15G014200	3.41	2.82	3.58	2.85	3.16	3.12	3.46	4.44	2.68	3.67	3.22	3.69	3.58	3.71	4.73	3.01	2.93	3.29	3.61	3.9	3.2	2.73	3.12	3.32
Glyma.15G033800	5.71	4.73	5.98	5.65	6.01	5.61	3.9	4.59	3.99	5.16	5.52	5.84	7.28	6.41	7.39	9.46	7.42	9.36	9.83	6.37	8.45	10.54	8.56	8.19
Glyma.15G082900	16.43	16.92	16.71	18.82	18.05	18.14	12.65	8.7	13.9	14.42	16.23	16.83	25.29	25.54	30.12	26.49	26.48	26.72	20.7	18.77	21.27	26.26	24.61	25.78
Glyma.15G119000	1.56	1.39	1.33	1.67	2.2	1.59	1.39	2.28	2.15	1.45	2.24	1.25	1.01	0.62	0.6	0.36	0.3	0.36	0.23	0.61	0.57	0.16	0.47	0.18
Glyma.15G234100	10.71	9.71	11.44	9.85	9.96	11.25	9.71	18.06	8.61	9.37	12.26	9.52	7.41	7.16	6.95	8.15	8.48	8.54	2.63	4.91	5.11	1.15	2.52	2.24
Glyma.16G011200	15.01	12.63	14.72	12.87	14.26	12.59	12.99	14.7	9.94	14.72	17.9	12.57	10.15	10.18	12.41	10.67	13.57	11.73	12.92	17.33	14.58	11.39	13.46	13.65
Glyma.16G093600	16.63	15.19	12.66	14.38	17.61	14.17	10.74	9.86	11.7	14.32	15.34	15.73	10.32	11.75	11.86	13.86	13.42	14.98	8.31	12.96	13.75	13.13	11.48	14.22
Glyma.16G167500	3.13	4.13	3.41	4.47	3.43	4.88	2.3	3	2.47	3.9	3.42	3.97	1.74	1.42	1.55	1.92	2.39	1.96	0.74	1.54	1.51	1.37	1.79	1.97
Glyma.16G167600	15.08	17.24	11.85	18.15	13.8	16.23	12.14	13.14	16.82	15.94	12.03	15.06	23.21	23.31	24.09	36.73	37.63	45.52	29.12	41.73	27.59	43.23	37.76	36.68
Glyma.16G167700	0.05	0	0.03	0	0	0	0.08	0	0	0	0	0	0	0	0	0	0	0	0	0	0	0	0	0
Glyma.17G128500	1.61	1.37	1.28	1.47	1.72	1.71	1.21	1.19	1.84	1.2	1.56	0.76	1.02	1.41	1.25	2.08	2.17	1.82	0.95	1.36	1.18	0.78	1.5	1.45
Glyma.17G194700	6.65	7.07	6.46	5.83	6.85	5.31	7.8	7.67	9.05	7	7.7	6.21	7.07	5.63	6.58	5.33	5.08	5.3	5.24	5.7	6.38	4.6	6.08	6.64
Glyma.18G010000	9.63	8.33	8.65	9.18	9	8.26	8.79	11.83	8.49	9.32	9.72	9	8.82	7.6	9.31	9.39	7.24	8.53	9.28	8.59	9.14	9.81	10.17	9.67
Glyma.18G202400	0.64	1.08	0.86	0.64	0.67	0.55	2.97	1.09	2.07	0.96	0.49	1.21	0.73	1.75	1.49	0.35	1.05	0.74	2.34	1.7	1.12	0.95	1.35	1.2
Glyma.18G281800	5.52	6.35	6.63	5.49	7.29	5.97	7.57	9.08	6.06	5.87	7.31	6.1	5.29	4.81	5.73	3.99	4.48	3.55	3.7	3.23	2.88	2.48	3.61	3.81
Glyma.19G190000	1.8	1.23	2.24	1.64	4.39	1.72	3.79	2.97	3.23	1.04	2.36	1.57	568.08	445.95	495.84	633.24	399.51	427.04	718.44	764.81	710.91	597.38	446.26	434.83
Glyma.19G192300	5.64	2.44	8.18	3.46	6.5	2.52	10.41	7.26	8.24	3.19	8.14	3.48	0.57	1.41	1.12	0.6	2.94	0.44	0.23	1.77	3.1	0.3	1.06	1.77
Glyma.19G243500	0.76	1.13	0.85	1.7	0.97	1.12	1.12	0.35	1.86	0.63	0.51	1.17	0.8	0.18	0.32	0.07	0.25	0.14	0.04	0.16	0.13	0.04	0.1	0.22
Glyma.20G166500	9.86	9.59	9.64	11.12	11.15	12.54	11.34	13.29	9.88	12.51	11.99	12.36	3.17	3.34	6.38	4.54	6.23	5.76	2.88	9.61	6.65	2.28	7.11	4.85
Glyma.20G166600	15.83	18.64	15.15	18.21	14.39	18.41	15.16	15.18	20.06	17.45	13.04	17.41	8.7	10.57	8.96	11.56	11.8	15.46	8.69	15.63	7.51	8.67	10.23	11.04
Glyma.20G166800	34.33	37.96	31.44	35.79	32.65	36.74	34.33	45.99	39.7	37.38	28.22	35.41	18.46	20.11	22.91	21.32	17.74	29.53	24.83	29.9	24.41	17.32	22.22	22.51
Glyma.20G184500	0.27	0.42	0.03	0.24	0.15	0.33	0.09	0.22	0.44	0.3	0.06	0.24	0	0	0.06	0.03	0.06	0	0	0	0	0	0	0
Glyma.20G188100	0.38	0.26	0.74	0.3	0.71	0.33	0.58	0.45	0.83	0.15	0.55	0.37	0.07	0.12	0.08	0.05	0.15	0.05	0.02	0.1	0.08	0	0.22	0.05
Glyma.20G189000	7.52	4.28	6.76	4.23	6.47	4.33	3.59	4.44	3.6	7.48	8.79	6.61	5.55	5.32	6.27	5.97	6.23	5.15	3.5	4.98	6.52	5.59	6.98	5.4
Glyma.20G224000	1.32	1.15	2.33	2.07	1.59	1.69	1.38	1.12	2.62	1.51	1.02	1.78	0.22	0.14	0.28	0.17	0.67	0.32	0.05	0.31	0.54	0.1	0.21	0.31
Glyma.20G249900	12.86	11.08	14.5	14.05	13.7	13.88	10.58	15.37	11.02	11.02	14.63	9.68	10.28	8.99	9.5	13.18	10.97	13.44	9.3	13.51	11.91	9.63	10.02	10.79
Note: FPKM, Fragments per kilobase for a million reads; F-3h, F-6h, F-12h, F-24h denoted the roots sampled at 3 h, 6 h, 12 h and 24 h after submergence stress treatment, respectively; ck-3h,ck-6h, ck-13h and ck-24h indicate the roots from plants untreated by submergence stress.
