# Supplementary material for: Genome-wide characterization and expression analysis of soybean trihelix gene family
Source: PeerJ. 2020 Mar 13;8:e8753. doi: 10.7717/peerj.8753 (PMC7075366; doi:10.7717/peerj.8753)
Supplement: Table S7 [file peerj-08-8753-s013.xlsx]

## Sheet: Table S7
			Table S7. Differentially expressed trihelix genes in soybean plants after submergence treatment
			GeneID	log2FoldChange	up/down	adjusted P value
		3h	Glyma.01G121000	1.85616	up	0.0207045
			Glyma.01G150500	1.33974	up	1.96e-08
			Glyma.03G189600	10.2705	up	8.06e-161
			Glyma.03G246000	1.95223	up	8.94e-06
			Glyma.04G135400	-1.18184	down	0.0212485
			Glyma.04G194600	1.01836	up	3.45e-07
			Glyma.04G216100	2.51457	up	6.88e-27
			Glyma.05G200400	-1.42931	down	0.0133404
			Glyma.06G149900	3.14082	up	2.06e-59
			Glyma.07G042800	1.68932	up	9.01e-33
			Glyma.07G151100	1.03456	up	0.0041805
			Glyma.08G007800	-1.91719	down	0.023062
			Glyma.09G116400	4.04074	up	7.48e-90
			Glyma.10G161200	-1.57247	down	0.0014949
			Glyma.11G156700	-1.93172	down	4.68e-11
			Glyma.11G247300	1.52821	up	7.3e-16
			Glyma.13G149700	7.98933	up	6.01e-278
			Glyma.13G229600	1.78356	up	1.61e-30
			Glyma.15G082900	1.30784	up	2.51e-17
			Glyma.16G167600	1.29172	up	2.63e-11
			Glyma.18G202400	1.24452	up	0.0168991
			Glyma.19G190000	8.6624	up	4.32e-232
			Glyma.19G192300	-1.74486	down	0.00103422
			Glyma.20G188100	-1.75666	down	0.0404907
			Glyma.20G224000	-2.19181	down	2.22e-05
		6h	Glyma.01G121000	1.98122	up	0.00312219
			Glyma.02G082000	1.00567	up	0.00792931
			Glyma.02G082100	1.39014	up	1.3e-10
			Glyma.03G189600	7.83423	up	8.13e-49
			Glyma.04G216100	2.34902	up	1.71e-29
			Glyma.05G200400	-5.28567	down	2.74e-08
			Glyma.06G149900	3.22816	up	6.49e-105
			Glyma.06G171400	-2.21396	down	1e-08
			Glyma.07G042800	1.94048	up	7.2e-41
			Glyma.07G151100	1.29397	up	3.58e-06
			Glyma.08G007800	-2.7233	down	0.00529977
			Glyma.09G014300	-1.45875	down	0.0193645
			Glyma.09G116400	4.05739	up	5.68e-107
			Glyma.10G202300	-1.33877	down	0.0423658
			Glyma.11G156700	-1.04199	down	0.00033443
			Glyma.11G247300	1.9087	up	5e-19
			Glyma.13G149700	6.78042	up	2.31e-67
			Glyma.13G229600	1.59297	up	7e-21
			Glyma.15G033800	1.33377	up	8.2e-10
			Glyma.15G082900	1.25828	up	3.32e-14
			Glyma.15G119000	-1.67117	down	0.000263733
			Glyma.16G167600	2.02498	up	1.35e-23
			Glyma.19G190000	8.14921	up	1.89e-83
			Glyma.19G243500	-2.37672	down	2.41e-05
			Glyma.20G224000	-1.50222	down	0.00254448
		12h	Glyma.01G150500	1.39297	up	4.24209e-08
			Glyma.02G082100	1.69589	up	3.3573e-05
			Glyma.03G056900	1.01758	up	0.046436
			Glyma.03G189600	9.75772	up	1.56083e-286
			Glyma.04G135400	-1.50896	down	0.00141007
			Glyma.04G216100	1.45028	up	4.78276e-05
			Glyma.05G200400	-5.71853	down	1.10997e-09
			Glyma.06G149900	2.73405	up	2.53798e-19
			Glyma.06G171400	-4.39135	down	3.84979e-11
			Glyma.07G042800	2.43252	up	2.09629e-24
			Glyma.07G151100	1.79915	up	9.1226e-06
			Glyma.08G007800	-4.44587	downo	8.89526e-06
			Glyma.09G014300	-1.74759	down	0.0184331
			Glyma.09G116400	3.93751	up	2.35701e-38
			Glyma.10G065100	1.02625	up	5.86433e-06
			Glyma.10G066800	-3.40341	dowon	0.0116815
			Glyma.10G201400	1.06919	up	1.41018e-06
			Glyma.10G202300	-2.87094	down	5.27564e-06
			Glyma.10G298700	1.03778	up	6.40177e-06
			Glyma.11G156700	-1.45693	down	0.000901234
			Glyma.11G247300	1.68068	up	8.41129e-14
			Glyma.13G149700	7.12149	up	3.91306e-174
			Glyma.13G149900	1.29573	up	9.67418e-08
			Glyma.13G195800	-1.51853	down	0.00417527
			Glyma.13G229600	1.64187	up	2.48211e-09
			Glyma.15G033800	1.80686	up	4.44743e-10
			Glyma.15G082900	1.60422	up	5.60127e-09
			Glyma.15G119000	-1.26755	down	0.0214862
			Glyma.16G011200	1.06426	up	4.2712e-05
			Glyma.16G167600	2.03976	up	2.2503e-14
			Glyma.19G190000	8.56719	up	0
			Glyma.19G192300	-1.52928	down	0.0351489
			Glyma.19G243500	-2.41373	down	0.00309654
			Glyma.20G184500	-3.94566	down	0.0141543
			Glyma.20G188100	-2.27266	down	0.00505663
			Glyma.20G189000	1.16538	up	0.000215092
			Glyma.20G224000	-1.67108	down	0.0291544
		24h	Glyma.01G150500	1.36948	up	4.14484e-15
			Glyma.02G082100	1.3374	up	4.42587e-05
			Glyma.03G189600	10.8701	up	1.04276e-142
			Glyma.05G200400	-5.36335	down	2.71726e-08
			Glyma.06G149900	2.53733	up	4.74327e-23
			Glyma.06G171400	-3.69848	down	4.99022e-09
			Glyma.07G042800	1.53861	up	1.4695e-16
			Glyma.07G151100	2.13731	up	1.07595e-12
			Glyma.08G007800	-2.7372	down	0.00654239
			Glyma.09G014300	-2.36964	down	0.00413942
			Glyma.09G116400	3.32324	up	6.55646e-40
			Glyma.10G066800	-3.9979	down	0.0131929
			Glyma.10G201400	1.16802	up	5.32916e-08
			Glyma.10G202300	-2.84449	down	0.00055766
			Glyma.11G156700	-1.26047	down	1.09642e-05
			Glyma.11G247300	1.45279	up	1.38612e-10
			Glyma.13G149700	7.68472	up	9.37454e-287
			Glyma.13G195800	-1.96618	down	1.498e-10
			Glyma.13G229600	1.13572	up	7.24257e-14
			Glyma.13G290500	1.07574	up	2.8526e-05
			Glyma.15G033800	1.51299	up	1.72846e-08
			Glyma.15G082900	1.46696	up	7.56349e-12
			Glyma.15G119000	-1.81131	down	0.00276573
			Glyma.15G234100	-1.65051	down	6.68026e-09
			Glyma.16G167600	2.22881	up	2.3164e-19
			Glyma.18G202400	1.12518	up	0.0313041
			Glyma.19G190000	8.94278	up	6.03805e-146
			Glyma.19G192300	-1.52388	down	0.00922909
			Glyma.19G243500	-1.94526	down	0.00664221
			Glyma.20G184500	-3.85602	down	0.0185019
			Glyma.20G224000	-2.06116	down	4.92911e-05
			Note: CK indicates the roots from the plants did not treated by submergence stress;F indicates the roots sampled at 3, 6, 12 or 24 hour after submergence treatment. The RNA-seq data was obtained from NCBI Sequence Read Archive (SRA) (SRP181976) (Lin et al., 2019).
