# Supplementary material for: Genome-wide characterization and expression analysis of soybean trihelix gene family
Source: PeerJ. 2020 Mar 13;8:e8753. doi: 10.7717/peerj.8753 (PMC7075366; doi:10.7717/peerj.8753)
Supplement: Table S8 [file peerj-08-8753-s014.xlsx]

## Sheet: Sheet1
		Table S8. The expression of trihelix genes in the leaves of soybean under MAMP mixture treatment
			Gene ID	Log2FoldChange (MAPK treatment vs CK)	adjusted P-value
			Glyma.01g121000	1.26821	0.02997
			Glyma.01g150500	0.125035	0.702
			Glyma.02g082000	-0.70496	0.0491
			Glyma.02g082100	-0.863444	0.0282
			Glyma.03g056900	0.0824239	0.77
			Glyma.03g081500	#N/A	#N/A
			Glyma.03g189600	#N/A	#N/A
			Glyma.03g191700	0.17987	0.577
			Glyma.03g246000	#N/A	#N/A
			Glyma.04g135400	-0.931311	0.0165
			Glyma.04g194600	0.0807679	0.823
			Glyma.04g216100	#N/A	#N/A
			Glyma.05g200400	-0.11308	0.703
			Glyma.06g149900	0.0177221	0.951
			Glyma.06g171400	-0.467071	0.149
			Glyma.07g042800	-0.352684	0.443
			Glyma.07g087900	-0.068287	0.854
			Glyma.07g151100	0.657963	0.363
			Glyma.08g007800	0.66914	0.264
			Glyma.08g051800	-0.571499	0.104
			Glyma.08g257500	-0.379412	0.282
			Glyma.09g014300	0.372802	0.254
			Glyma.09g116400	-0.396677	0.298
			Glyma.09g188900	-0.252671	0.418
			Glyma.09g245300	-0.933054	0.0536
			Glyma.10g064900	-0.301651	0.362
			Glyma.10g065100	-0.54604	0.292
			Glyma.10g066800	-1.13456	0.0463756
			Glyma.10g161200	#N/A	#N/A
			Glyma.10g201400	-0.486808	0.353
			Glyma.10g202300	0.178322	0.674
			Glyma.10g225100	-0.775525	0.0468
			Glyma.10g225200	-0.548085	0.161
			Glyma.10g225300	-0.0569139	0.848
			Glyma.10g298700	-0.555086	0.187
			Glyma.11g156700	-0.431082	0.197
			Glyma.11g247300	-0.476232	0.128
			Glyma.12g210900	0.274958	0.389
			Glyma.13g149700	#N/A	#N/A
			Glyma.13g149900	#N/A	#N/A
			Glyma.13g195800	-0.290598	0.335
			Glyma.13g229600	-0.384203	0.282
			Glyma.13g290500	-0.488189	0.277
			Glyma.13g340600	-0.393053	0.235
			Glyma.13g359800	#N/A	#N/A
			Glyma.15g014200	-0.154557	0.637
			Glyma.15g033800	0.0398721	0.884
			Glyma.15g082900	-0.807222	0.101
			Glyma.15g119000	#N/A	#N/A
			Glyma.15g234100	#N/A	#N/A
			Glyma.16g011200	-0.382904	0.209
			Glyma.16g093600	-1.28231	0.0536
			Glyma.16g167500	-0.615328	0.0906
			Glyma.16g167600	-0.696474	0.0438
			Glyma.16g167700	-0.305332	0.298
			Glyma.17g128500	0.0435772	0.897
			Glyma.17g194700	#N/A	#N/A
			Glyma.18g010000	-0.700104	0.05
			Glyma.18g202400	-0.181344	0.596
			Glyma.18g281800	0.0313434	0.924
			Glyma.19g190000	#N/A	#N/A
			Glyma.19g192300	-0.526311	0.172
			Glyma.19g243500	-0.609385	0.135
			Glyma.20g166500	0.0963654	0.746
			Glyma.20g166600	-0.723413	0.0651
			Glyma.20g166800	-0.506801	0.197
			Glyma.20g184500	-0.204612	0.536
			Glyma.20g188100	0.354412	0.278
			Glyma.20g189000	#N/A	#N/A
			Glyma.20g224000	-0.53284	0.121
			Glyma.20g249900	-0.467115	0.185
			Note: #N/A indicates that the expression was not detected. MAMP, microbe-associated molecular patterns.
