# Supplementary material for: Genome-wide characterization and expression analysis of soybean trihelix gene family
Source: PeerJ. 2020 Mar 13;8:e8753. doi: 10.7717/peerj.8753 (PMC7075366; doi:10.7717/peerj.8753)
Supplement: Table S9 [file peerj-08-8753-s015.xls]

## Sheet: Table S9
			Table S9. Sequences of primers used in this study
			Primer name	Primer Sequences (5'-3')
			qGlyma03G189600-F	GTCTTTCTTCTAACTTCGCACCA
			qGlyma03G189600-R	CTTGGCATGTGGCAAGTGTC
			qGlyma04G216100-F	AAGTCAAGAACAGCAACAGCAACA
			qGlyma04G216100-R	CCTGCTCTTGTTGATGAATAGTTGG
			qGlyma05G200400-F	TGCCAAAGGGTGAGAATGGT
			qGlyma05G200400-R	TTGAGCCTCCCTGCAATACC
			qGlyma06G149900-F	TCCCCCAAATTTCACCCGAG
			qGlyma06G149900-R	GGAATTCCGGTCACCGTCTT
			qGlyma07G042800-F	TCTTGTACGTGAGTAGGGACA
			qGlyma07G042800-R	CCGTGGTCTCCACCGATATG
			qGlyma07G151100-F	ACACCTGATGTTCACACCACA
			qGlyma07G151100-R	GGGGTTGAAGGGTGTTTGAT
			qGlyma08G007800-F	AAGGAGAAGAAGTTGCCGGG
			qGlyma08G007800-R	TTGGCGCCATCTTAACGAGT
			qGlyma09G116400-F	GGGTGTAACCGATGCTGGAA
			qGlyma09G116400-R	CCATTGTCTCCTCTCTCGGC
			qGlyma11G156700-F	ATGGGAGGCATCCGTCAATG
			qGlyma11G156700-R	GGACATCACCTGGTAGCATGA
			qGlyma11G247300-F	TATGTGCGGCACTAACCTGG
			qGlyma11G247300-R	GTTGCGTAAAGGTGAGCATATT
			qGlyma13G149700-F	AAAGCAGCATCCTTGTTGGC
			qGlyma13G149700-R	GAGCAGACAGAAACTGCCCA
			qGlyma13G195800-F	TGAGGTTTTTACGACCACACA
			qGlyma13G195800-R	TTGCGGTTGCCATCATGTTT
			qGlyma13G229600-F	CGTTGACGGTGCTCGAAATG
			qGlyma13G229600-R	AAGAAGCAACTGGTCAGCCA
			qGlyma15G082900-F	GAGGAATTACTCCGCCGTGG
			qGlyma15G082900-R	ATCCTCTAGCGACCCACTCA
			qGlyma16G167600-F	ACTTCCATTGCCACCAGTGT
			qGlyma16G167600-R	GAAGGAAGGTGGGGTGATGG
			qGlyma19G190000-F	GTTTCCTACGCCACTCACCA
			qGlyma19G190000-R	CTATGCCACGGGGACACTTT
			qGlyma20G224000-F	GGCAGTTCATCCTACCCTTCC
			qGlyma20G224000-R	TCTGGGTACAGATCCAGTCGT
			qGlyma20G166800-F	CACCGTTGACTTTACAACTCATGT
			qGlyma20G166800-R	TGTCACTAAACCACTTTCCCCT
